# Supplementary material for: Long acting β2agonists for stable chronic obstructive pulmonary disease with poor reversibility: a systematic review of randomised controlled trials
Source: Springer Nature journal article supplement (doi:10.1186/1471-2466-4-7), 2004-08-31
Supplement: Additional file 2 [file 1471-2466-4-7-s2.pdf]

**Search Strategy#1**  
**Long-acting  $\beta_2$ -agonists for maintenance therapy of stable chronic obstructive pulmonary disease: a systematic review**

| DATABASES                                                                                                                                                                                                                                        | LIMITS       | SUBJECT HEADINGS/KEYWORDS                                                                                                                                                                                                                                                                                                                                                                                                                                                                                                                                                                                                                                                                                                                                                                                                                                                                                                                                                                                                                                                                                                                                                                                                                                                                                                                                                                                                                                                                                                                                                                                                                                                                                                                                                                                                       |
|--------------------------------------------------------------------------------------------------------------------------------------------------------------------------------------------------------------------------------------------------|--------------|---------------------------------------------------------------------------------------------------------------------------------------------------------------------------------------------------------------------------------------------------------------------------------------------------------------------------------------------------------------------------------------------------------------------------------------------------------------------------------------------------------------------------------------------------------------------------------------------------------------------------------------------------------------------------------------------------------------------------------------------------------------------------------------------------------------------------------------------------------------------------------------------------------------------------------------------------------------------------------------------------------------------------------------------------------------------------------------------------------------------------------------------------------------------------------------------------------------------------------------------------------------------------------------------------------------------------------------------------------------------------------------------------------------------------------------------------------------------------------------------------------------------------------------------------------------------------------------------------------------------------------------------------------------------------------------------------------------------------------------------------------------------------------------------------------------------------------|
| <p>DIALOG OneSearch<sup>®</sup></p> <p>EMBASE<sup>®</sup> (1974 –2001)/Jun Week 3</p> <p>MEDLINE<sup>®</sup> 1966 –2001/ June Week 4</p> <p>HealthSTAR<sup>®</sup> 1975 – 2000/Dec</p> <p>BIOSIS Previews<sup>®</sup> 1969 – 2001/Jun Week 3</p> | <p>Human</p> | <p>Chronic Obstructive Lung Disease/de OR Obstructive Airway Disease/de OR Chronic Obstructive Pulmonary Disease/de OR Lung Emphysema/de OR Bronchitis/de OR Chronic Bronchitis/de OR Asthma!/de OR Emphysema/de OR Lung Diseases, Obstructive!/de OR Bronchitis!/de OR Pulmonary Emphysema!/de OR Airway Obstruction!/de OR Emphysema! /de OR Mediastinal Emphysema/de OR Subcutaneous Emphysema/de OR Obstructive Lung Disease/de OR Chronic Obstructive Pulmonary Disease/de OR Asthma/de OR Emphysema/de OR Bronchitis/de OR COPD/ti,ab OR COAD/ti,ab OR chronic(w)obstructive(w)lung/ti,ab OR chronic(w)obstructive(w)airway?/ti,ab OR chronic(w)obstructive(w)pulmonary /ti,ab OR bronchit?/ti,ab OR bullous(w)disease?/ti,ab OR emphysema/ti,ab OR lung(w)emphysema/ti,ab or pulmonary(w)emphysema/ti,ab or asthma/ti,ab OR <i>Pulmonary Disease, Chronic Obstructive!/de (added in alerts and updates as it was introduced in 2002)</i></p> <p style="text-align: center;"><b>AND</b></p> <p>long(w)acting /ti,ab AND (<i>combine long-acting with drug class terms</i>)</p> <p>[(Bronchodilator Agents!/de OR Adrenergic Beta-Agonists!/de OR Receptors, Adrenergic, Beta-2!/de OR Adrenergic(1N)beta/ti,ab AND (receptor? or agonist?) /ti,ab OR beta(w)2(w)adrenoceptor(w)agonist? /ti,ab OR bronchodilator?/ti,ab )] OR</p> <p>Foradil /ti,ab OR foradile /ti,ab OR oxis /ti,ab OR eolus/ti,ab OR atock/ti,ab OR neblik/ti,ab OR serevent/ti,ab OR aeromax/ti,ab OR arial/ti,ab OR salmetedur/ti,ab OR beglan/ti,ab OR betamican/ti,ab OR inaspir/ti,ab OR salmeter/ti,ab OR serobid/ti,ab OR servent/ti,ab OR formoterol/ti,ab OR formoterol(w)fumarate /ti,ab OR salmeterol(w)xinafoate/ti,ab OR salmeterol/ti,ab OR eformoterol/ti,ab OR eformoterol(w)fumarate/ti,ab OR bambuterol/ti,ab OR bambec/ti,ab OR</p> |

| DATABASES                                    | LIMITS | KEYWORDS/SUBJECT HEADINGS                                                                                                                                                                                                                                                                                                                                                                                                                                                                                                                                                                                                                                                                                                                                                                                                                                                                                                                                                                                                                                                                                                                                                                                                                                                                                                                                                                                |
|----------------------------------------------|--------|----------------------------------------------------------------------------------------------------------------------------------------------------------------------------------------------------------------------------------------------------------------------------------------------------------------------------------------------------------------------------------------------------------------------------------------------------------------------------------------------------------------------------------------------------------------------------------------------------------------------------------------------------------------------------------------------------------------------------------------------------------------------------------------------------------------------------------------------------------------------------------------------------------------------------------------------------------------------------------------------------------------------------------------------------------------------------------------------------------------------------------------------------------------------------------------------------------------------------------------------------------------------------------------------------------------------------------------------------------------------------------------------------------|
|                                              |        | <p>RN=73573-87-2 OR RN=43229-80-7 OR<br/>RN=94749-08-3</p> <p style="text-align: center;"><b>AND</b></p> <p>Controlled Study/de OR Meta Analysis/de OR<br/>Randomized Controlled Trial/de OR Single-blind<br/>Method/de OR Double-blind Method/de OR Meta-<br/>Analysis/de OR Random Allocation/de OR<br/>DT=Meta-Analysis OR DT=Randomized<br/>Controlled Trial OR DT=Controlled Clinical Trial<br/>OR clinical trial/de OR randomized trial/de OR<br/>prospective study/de OR randomized controlled<br/>trial/de OR multicenter study/de OR randomized<br/>clinical trial/de OR random?/ti,ab OR<br/>[(single OR double OR triple OR treble)() (blind?<br/>OR dumm? or mask?)]/ti,ab OR placebo?/ti,ab or<br/>meta()analy?/ti,ab OR metaanaly?/ti,ab OR<br/>(quantitative?(w)(review? OR overview))/ti,ab OR<br/>(methodologic?(w)(review? OR overview?))/ti,ab<br/>OR control?(w)stud?/ti,ab OR<br/>control?(w)trial?/ti,ab OR RCT?/ti,ab OR<br/>control?(w)clinical(w)stud?/ti,ab OR<br/>control?(w)clinical(w)trial?/ti,ab</p> <p style="text-align: center;"><b>AND</b></p> <p>Human? OR people?OR person?</p> <p><i>Search performed 25/06/2001. Weekly DIALOG®<br/>alerts set up until 2002 to capture new references.<br/>Total = 504 unique hits</i></p> <p><i>MEDLINE® = 323 hits</i><br/><i>HealthSTAR® = 54 hits</i><br/><i>EMBASE® = 122 hits</i><br/><i>BIOSIS Previews® = 5 hits</i></p> |
| The Cochrane Library,<br>2001, 2002 & PubMed | Human  | Same MeSH headings and keywords as DIALOG<br>MEDLINE® search. Drug class terms, trade<br>names, numbers and the clinical filter excluded in<br>the Cochrane Library. Appropriate syntax used to<br>search Cochrane Library and PubMed.                                                                                                                                                                                                                                                                                                                                                                                                                                                                                                                                                                                                                                                                                                                                                                                                                                                                                                                                                                                                                                                                                                                                                                   |

## Search Strategy#2

### Long-acting $\beta_2$ -agonists for maintenance treatment of stable chronic obstructive pulmonary disease: a systematic review of clinical studies

| DATABASES                                                                                                                                                                                 | DATES/LIMITS | SUBJECT HEADINGS/KEYWORDS                                                                                                                                                                                                                                                                                                                                                                                                                                                                                                                                                                                                                                                                                                                                                                                                                                                                                                                                                                                                                                                                                                                                                                                                                                                                                                                                                                                                                                                                                                                                                                                                                                                                                                                                                                                                           |
|-------------------------------------------------------------------------------------------------------------------------------------------------------------------------------------------|--------------|-------------------------------------------------------------------------------------------------------------------------------------------------------------------------------------------------------------------------------------------------------------------------------------------------------------------------------------------------------------------------------------------------------------------------------------------------------------------------------------------------------------------------------------------------------------------------------------------------------------------------------------------------------------------------------------------------------------------------------------------------------------------------------------------------------------------------------------------------------------------------------------------------------------------------------------------------------------------------------------------------------------------------------------------------------------------------------------------------------------------------------------------------------------------------------------------------------------------------------------------------------------------------------------------------------------------------------------------------------------------------------------------------------------------------------------------------------------------------------------------------------------------------------------------------------------------------------------------------------------------------------------------------------------------------------------------------------------------------------------------------------------------------------------------------------------------------------------|
| DIALOG<br>OneSearch <sup>®</sup><br><br>EMBASE <sup>®</sup><br><br>PASCAL<br><br>MEDLINE <sup>®</sup><br><br>BIOSIS<br>Previews <sup>®</sup><br><br>ToxFile<br><br>SciSearch <sup>®</sup> | Human        | <p>Chronic Obstructive Lung Disease/de OR<br/>           Chronic Obstructive Pulmonary Disease/de OR<br/>           Lung Emphysema!/de OR Chronic Bronchitis/de<br/>           OR Lung Diseases, Obstructive/de OR<br/>           Pulmonary Disease, Chronic Obstructive!/de OR<br/>           Bronchitis!/de OR Pulmonary Emphysema!/de<br/>           OR Emphysema! /de OR Obstructive Lung<br/>           Disease/de OR COPD/ti,ab OR COAD/ti,ab OR<br/>           bronchit?/ti,ab OR lung(4N)emphysema/ti,ab OR<br/>           pulmonary(4N)emphysema OR<br/>           chronic(4N)obstructive</p> <p><i>(Copd terms combined with Asthma terms)</i></p> <p style="text-align: center;"><b>AND</b></p> <p>Asthma!/de OR asthma?/ti,ab OR<br/>           Wheezing/deOR Respiratory Sounds/de OR<br/>           Bronchial Hyperactivity/de OR wheez?/ti,ab<br/> <i>(Results from COPD terms “OR”ed with Results<br/>           from COPD+ASTHMA terms)</i></p> <p style="text-align: center;"><b>AND</b></p> <p><i>(Combine drug class terms with long-acting)</i><br/>           [( Bronchodilating Agent/de OR Beta Adrenergic<br/>           Receptor Stimulating Agent/de OR<br/>           Bronchodilator-Drug/de OR Beta-Adrenergic<br/>           Receptor/de OR Beta-Adrenergic Agonists-<br/>           Drug/de OR Beta-Adrenergic Agonists/de OR<br/>           Bronchodilator Agents!/de OR Adrenergic Beta-<br/>           Agonists!/de OR Receptors, Adrenergic, Beta-<br/>           2!/de)] AND long(1N)acting /ti,ab OR</p> <p>Salmeterol/de OR Formoterol/de OR Formoterol<br/>           Fumarate/de OR Bambuterol/de OR Salmeterol<br/>           Xinafoate/de OR Salmeterol/id OR Formoterol/id<br/>           OR Bambuterol/id OR</p> <p>RN=73573-87-2 OR RN=43229-80-7 OR RN=94749-<br/>           08-3</p> |

| DATABASES | LIMITS | SUBJECT HEADINGS/KEYWORDS                                                                                                                                                                                                                                                                                                                                                                                                                                                                                                                                                                                                                                                                                                                                                                                                                                                                                                                                                                                                                                                                                                                                                                                                                                                                                                                                                                                                                                                                                                                                                                                                                                                                                                            |
|-----------|--------|--------------------------------------------------------------------------------------------------------------------------------------------------------------------------------------------------------------------------------------------------------------------------------------------------------------------------------------------------------------------------------------------------------------------------------------------------------------------------------------------------------------------------------------------------------------------------------------------------------------------------------------------------------------------------------------------------------------------------------------------------------------------------------------------------------------------------------------------------------------------------------------------------------------------------------------------------------------------------------------------------------------------------------------------------------------------------------------------------------------------------------------------------------------------------------------------------------------------------------------------------------------------------------------------------------------------------------------------------------------------------------------------------------------------------------------------------------------------------------------------------------------------------------------------------------------------------------------------------------------------------------------------------------------------------------------------------------------------------------------|
|           | Human  | <p>OR serobid/ti,ab OR servent/ti,ab OR serevent/ti,ab<br/> OR formoterol/ti,ab OR formoterol(w)fumarate<br/> /ti,ab OR optrol/ti,ab OR<br/> salmeterol(w)xinafoate/ti,ab OR salmeterol/ti,ab<br/> OR eformoterol/ti,ab OR<br/> eformoterol(w)fumarate/ti,ab OR bambuterol/ti,ab<br/> OR bambec/ti,ab OR oxcol/ti,ab OR<br/> GR()33343x/ti,ab OR long(1N)acting()beta(1N)2</p> <p style="text-align: center;"><b>AND</b></p> <p>Controlled Study!/de OR Meta Analysis/de OR<br/> Randomized Controlled Trials/de OR Single-blind<br/> Method/de OR Epidemiologic Research Design!/de<br/> OR Double-blind Method/de OR Meta-<br/> Analysis/de OR Random Allocation/de OR<br/> Clinical Trials!/de OR Clinical Trial!/de OR<br/> Prospective Studies/de OR Prospective Study/de<br/> OR Randomized Controlled Trial/de OR<br/> Multicenter Study/de OR Randomized Clinical<br/> Trial/de OR Comparative Study/de OR<br/> Randomized Trial/de OR Phase 1 Clinical Trial/de<br/> OR Phase 2 Clinical Trial/de OR Phase 3 Clinical<br/> Trial/de OR Phase 4 Clinical Trial/de OR Follow-<br/> up Studies/de OR DT=Meta-Analysis OR<br/> DT=Randomized Controlled Trial OR<br/> DT=Controlled Clinical Trial OR<br/> random?/ti,ab OR placebo? OR meta()analy? OR<br/> metaanaly? OR RCT? OR</p> <p>((control? OR clinical) (3N) (stud? OR trial?)) OR</p> <p>((single OR double OR triple OR treble) () (blind?<br/> OR dumm? OR mask?)) OR</p> <p>((quantitative? OR methodologic? OR systematic?)<br/> () (review? OR overview? OR synthes?s OR<br/> integration)) OR</p> <p>((crossover OR cross(1N)over OR prospective OR<br/> cohort OR parallel) () (stud? OR trial? OR design))</p> <p style="text-align: center;"><b>AND</b></p> |

| <b>DATABASES</b>                                                                                                 | <b>LIMITS</b> | <b>SUBJECT HEADINGS/KEYWORDS</b>                                                                                                                                                                                                                                                                                                                                                                                                                  |
|------------------------------------------------------------------------------------------------------------------|---------------|---------------------------------------------------------------------------------------------------------------------------------------------------------------------------------------------------------------------------------------------------------------------------------------------------------------------------------------------------------------------------------------------------------------------------------------------------|
|                                                                                                                  |               | <p><i>(Limit retrieval to human studies)</i></p> <p>Human? OR people? OR person?</p> <p><i>Performed 03 Dec 2002 Regular alerts set up on MEDLINE, EMBASE, BIOSIS Previews, Pharmaceutical News Index and Adis Clinical Trials Insight. Alerts are still ongoing in 2004.</i></p> <p><i>Total 297 unique records</i></p> <p><i>Medline 110</i></p> <p><i>Biosis 9</i></p> <p><i>Embase 171</i></p> <p><i>Pascal 6</i></p> <p><i>Toxfile 1</i></p> |
| <p>The Cochrane Library, Issue 4, 2002, all issues 2003. Issues 1,2,3, 2004.</p>                                 | <p>Human</p>  | <p>MeSH and keywords to mirror DIALOG® MEDLINE search excluding numbers which are ignored by the software. Clinical trial filter also excluded.</p> <p><i>The Cochrane Database of Systematic Reviews = 4 reviews; Protocols = 5; The Cochrane Controlled Trials Register = 109 references; INAHTA and other health care technology agencies = 2 abstracts</i></p>                                                                                |
| <p>PubMed 2002, 2003, 2004</p>                                                                                   | <p>Human</p>  | <p>MeSH and keywords to mirror DIALOG® MEDLINE search</p>                                                                                                                                                                                                                                                                                                                                                                                         |
| <p>Websites of health technology assessment and related agencies; clinical trial registries; other databases</p> |               | <p>AHRQ; National Research Register; University of York NHS Centre for Reviews and Dissemination – CRD databases; LILACS, etc; Websites of professional associations such as, European Respiratory Society, Canadian Respiratory Society etc.</p>                                                                                                                                                                                                 |
